# Supplementary material for: Integrated Pan-Cancer Analysis Reveals Distinct Clinical, Genomic and Immunological Features of the LILRB Immune Checkpoint Family in Acute Myeloid Leukemia
Source: Research Square preprint supplement (doi:10.21203/rs.3.rs-810313/v1), 2021-09-28
Supplement: Supplementary file 1 [file 59ef6af3961e1e841b3c9919.xlsx]

## Sheet: LILRB1
Supplementary Data 2. Spearman correlation results between LILRBs and immune checkpoints in TCGA AML dataset.
Gene Symbol	Regression Coefficient	Regression P value
CD86	0.782274	5.49015e-37
TNFRSF8	0.718059	1.02476e-28
PDCD1LG2	0.703173	4.04505e-27
CD48	0.676608	1.66849e-24
HAVCR2	0.637299	4.22903e-21
CD200R1	0.56527	5.40128e-16
C10orf54	0.480574	2.20857e-11
CD40	0.370682	5.16127e-07
CTLA4	0.341801	4.17481e-06
TNFSF15	0.337556	5.58056e-06
TIGIT	0.28865	0.000117456
TNFRSF9	0.284596	0.000147696
ICOS	0.198915	0.0087
LGALS9	0.19645	0.00958481
TMIGD2	-0.183633	0.0155885
NRP1	0.174595	0.0215919
IDO1	0.173064	0.0227855
TNFSF4	-0.159766	0.0357586
TNFRSF14	0.159102	0.036544
TNFSF9	0.156505	0.0397567
CD27	0.156161	0.0402
CD160	-0.15334	0.0439914
TNFRSF25	-0.149251	0.0500127
CD200	-0.149238	0.0500339
CD244	-0.14726	0.0531854
KIR3DL1	0.140707	0.0648213
LAIR1	0.134243	0.07826
CD28	0.132175	0.0830073
TNFRSF4	-0.128477	0.0920687
CD276	0.114211	0.134597
TNFRSF18	-0.111927	0.14262
TNFSF18	0.0887263	0.245706
TNFSF14	0.0844411	0.269345
ICOSLG	-0.0838938	0.272472
HHLA2	0.0742658	0.331511
CD40LG	0.0728069	0.341124
ADORA2A	0.0725424	0.342886
BTNL2	-0.070416	0.357255
CD274	0.0573348	0.453694
IDO2	0.0571248	0.455352
BTLA	0.0395633	0.605293
PDCD1	0.0390278	0.610189
CD44	0.033209	0.66447
CD80	-0.016505	0.829354
LAG3	-0.00675911	0.929671
CD70	0.00153808	0.983977
VTCN1	0.000131405	0.998631

## Sheet: LILRB2
Gene Symbol	Regression Coefficient	Regression P value
CD86	0.848749	3.44695e-49
TNFRSF8	0.778196	2.21692e-36
C10orf54	0.689586	9.54389e-26
HAVCR2	0.650677	3.34307e-22
CD200R1	0.614334	2.49369e-19
PDCD1LG2	0.596036	5.09923e-18
CD48	0.588056	1.79236e-17
TNFSF15	0.421728	7.5329e-09
TNFRSF9	0.340403	4.59574e-06
CD40	0.333979	7.10304e-06
CTLA4	0.271528	0.000301935
TMIGD2	-0.267519	0.000373366
CD200	-0.258307	0.000600736
TNFSF14	0.25194	0.000826273
LGALS9	0.239606	0.00149806
CD160	-0.222362	0.00327778
TNFSF4	-0.208856	0.00582203
LAIR1	0.185109	0.0147612
IDO1	0.175846	0.0206571
TNFRSF14	0.175674	0.0207841
CD244	-0.166656	0.0284177
ICOSLG	-0.165847	0.0292061
CD276	0.160172	0.0352851
TIGIT	0.155803	0.0406646
TNFSF9	0.146536	0.0543797
TNFRSF25	-0.145769	0.0556676
TNFRSF4	-0.143395	0.0598175
ICOS	0.135329	0.0758582
TNFRSF18	-0.127096	0.0956461
CD27	0.12636	0.0975992
ADORA2A	0.119453	0.117494
KIR3DL1	0.104333	0.171917
BTNL2	-0.0952599	0.212507
TNFSF18	0.093053	0.223341
CD28	0.0709062	0.35391
NRP1	0.0554189	0.468946
HHLA2	0.0496988	0.516113
CD274	0.0436348	0.568652
VTCN1	0.0434562	0.570238
CD40LG	0.0357081	0.640922
PDCD1	0.0246059	0.747951
CD80	-0.0235602	0.758324
CD70	-0.0234568	0.759352
IDO2	0.0203157	0.790777
BTLA	-0.0175049	0.819189
CD44	-0.0161463	0.833008
LAG3	-0.00268455	0.972037

## Sheet: LILRB3
Gene Symbol	Regression Coefficient	Regression P value
C10orf54	0.803059	2.7119e-40
CD86	0.791777	1.8827e-38
TNFRSF8	0.632363	1.04553e-20
HAVCR2	0.597836	3.82222e-18
CD200R1	0.580948	5.33594e-17
CD48	0.462373	1.51224e-10
PDCD1LG2	0.417212	1.1274e-08
TNFRSF9	0.384513	1.76023e-07
TNFSF15	0.352303	1.99896e-06
TNFSF14	0.31348	2.67339e-05
TMIGD2	-0.304765	4.56363e-05
CD200	-0.299532	6.24192e-05
CD244	-0.293363	8.9598e-05
CD160	-0.277173	0.000222666
LGALS9	0.268255	0.000359171
CD276	0.261295	0.000515805
LAIR1	0.231273	0.00220246
ICOSLG	-0.217884	0.00398034
TNFSF4	-0.207121	0.00625303
TNFRSF25	-0.204508	0.00695545
CD40	0.172313	0.0233916
TNFSF9	0.163279	0.0318366
TNFRSF4	-0.162377	0.0328067
CTLA4	0.156201	0.0401474
TNFRSF18	-0.145993	0.0552891
TNFRSF14	0.142591	0.0612792
ADORA2A	0.119875	0.116193
VTCN1	0.108961	0.153575
BTNL2	-0.104187	0.17252
HHLA2	0.0909783	0.233878
TIGIT	0.0798802	0.296155
CD80	-0.076059	0.319936
KIR3DL1	0.072807	0.341123
LAG3	-0.0724021	0.343822
IDO2	-0.0644403	0.399614
ICOS	0.0638634	0.403856
TNFSF18	0.0609535	0.425656
CD27	0.0595852	0.436138
BTLA	-0.0536604	0.48319
NRP1	0.0259018	0.735158
CD28	0.025392	0.740182
IDO1	0.0253511	0.740586
PDCD1	0.020414	0.789788
CD44	0.0100845	0.895235
CD40LG	-0.00822094	0.914513
CD274	-0.00311857	0.967518
CD70	0.0030223	0.96852

## Sheet: LILRB4
Gene Symbol	Regression Coefficient	Regression P value
C10orf54	0.488863	8.85069e-12
CD86	0.419217	9.4335e-09
TNFSF9	0.41697	1.15185e-08
LGALS9	0.406267	2.92381e-08
CD160	-0.371743	4.76052e-07
CD244	-0.362579	9.47424e-07
CD70	0.310614	3.1933e-05
LAIR1	0.299521	6.24567e-05
TNFRSF8	0.266342	0.000397122
TMIGD2	-0.261815	0.000502207
TNFRSF25	-0.258578	0.000592535
HHLA2	0.255978	0.000675655
CD276	0.245493	0.00113186
TNFSF15	0.236035	0.00176991
HAVCR2	0.224756	0.00294997
CD200	-0.223833	0.0030727
CD48	0.209339	0.00570698
PDCD1LG2	0.195019	0.0101341
CD200R1	0.188435	0.0130356
TNFRSF4	-0.178553	0.0187533
TNFSF14	0.172622	0.0231405
CD80	-0.158796	0.0369109
TNFRSF18	-0.1535	0.043768
TNFSF4	-0.148607	0.0510209
NRP1	0.138361	0.0694622
TNFRSF9	0.127366	0.0949398
CD40LG	-0.125202	0.100734
CD28	-0.122942	0.107081
TNFRSF14	0.0832712	0.276059
CD274	-0.0821523	0.282586
TNFSF18	0.0817162	0.285157
CD40	0.0745534	0.329637
CD44	-0.0698258	0.36131
LAG3	-0.063666	0.405313
BTNL2	0.0595953	0.43606
VTCN1	0.052451	0.493119
ICOSLG	-0.0504946	0.509408
KIR3DL1	-0.0504473	0.509806
TIGIT	-0.0481951	0.528906
CTLA4	0.0431757	0.572731
ICOS	-0.0348111	0.649335
PDCD1	0.0174475	0.819771
CD27	-0.0143137	0.85173
IDO1	-0.0082664	0.914042
BTLA	-0.00276087	0.971242
ADORA2A	0.00120442	0.987452
IDO2	0.000376867	0.996074

## Sheet: LILRB5
Gene Symbol	Regression Coefficient	Regression P value
TNFRSF8	0.448572	6.04186e-10
CD86	0.445179	8.41392e-10
CD48	0.432839	2.72239e-09
CTLA4	0.373476	4.16967e-07
HAVCR2	0.353643	1.81618e-06
PDCD1LG2	0.342625	3.94425e-06
TNFSF15	0.341512	4.25864e-06
CD200R1	0.320262	1.74267e-05
TNFRSF9	0.314287	2.54198e-05
C10orf54	0.272233	0.000290768
TIGIT	0.268622	0.000352284
CD40LG	0.26317	0.000468333
ICOS	0.243469	0.0012473
CD27	0.220861	0.00349964
CD40	0.204929	0.00683784
ADORA2A	0.187476	0.0135141
TNFSF4	-0.177935	0.0191743
NRP1	0.174169	0.0219184
CD200	-0.164044	0.0310328
CD28	0.157435	0.0385794
CD274	0.145428	0.0562486
TMIGD2	-0.133663	0.0795695
TNFRSF14	0.119177	0.118351
KIR3DL1	0.108848	0.154005
TNFSF18	0.107266	0.160112
IDO1	0.107009	0.161124
TNFRSF4	-0.103473	0.175499
LGALS9	0.0953296	0.212171
TNFRSF18	-0.0833352	0.275689
CD80	0.0819499	0.283777
ICOSLG	-0.0749857	0.326833
LAIR1	-0.0749729	0.326915
TNFSF14	0.0669675	0.381347
CD70	-0.0361957	0.636368
CD244	-0.035422	0.6436
CD160	-0.0338116	0.658761
PDCD1	0.033457	0.662119
HHLA2	0.0330811	0.665684
CD276	0.0261869	0.732353
TNFSF9	0.0220999	0.772882
BTNL2	0.0197072	0.796906
VTCN1	0.0188626	0.805433
LAG3	0.0186191	0.807895
TNFRSF25	0.010133	0.894735
BTLA	-0.00927086	0.903645
IDO2	0.00444921	0.953672
CD44	0.000851544	0.991128
